# Supplementary material for: Circulating microRNAs as biomarkers of disease and typification of the atherothrombotic status in antiphospholipid syndrome
Source: PubMed Central journal article supplement — Haematologica. 2018 Mar 15;103(5):908–18. doi: 10.3324/haematol.2017.184416 (PMC5927979; doi:10.3324/haematol.2017.184416), 2018-05
Supplement: 2017_184416-Disclosures_and_Contributions.pdf [file 2017_184416-Disclosures_and_Contributions.pdf]

Haematologica  
HAEMATOL/2017/184416  
Version 3

Circulating microRNAs as biomarkers of disease and typification of the  
atherothrombotic status in Antiphospholipid Syndrome

Carlos Perez-Sánchez, Iván Arias-de la Rosa, María Ángeles Aguirre,  
María Luque-Tévar, Patricia Ruiz-Limón, Nuria Barbarroja, Yolanda  
Jiménez-Gómez, María Carmen Ábalos-Aguilera, Eduardo  
Collantes-Estévez, Pedro Seguí, Francisco Velasco, María Teresa  
Herranz, Jesús Lozano-Herrero, María Julia Hernandez-Vidal,  
Constantino Martínez, Rocío González-Conejero, Massimo Radin,  
Savino Sciascia, Irene Cecchi, María José Cuadrado, and Chary  
López-Pedrera

Disclosures: Conflict-of-interest disclosure: The authors declare no competing financial interests.

Contributions: P.R-L, I.A-R, N.B, ML-T, and MC. A-A developed the in vivo assays, performed the experiments and solved technical problems. MA.A, MJ.C, E.C-E, MT.H, J.L-H, and MJ.H-V followed up with patients and contributed useful discussion and suggestions. C.P-S, C.M, R.G-C, S.S, and C.L-P formed the hypothesis, directed and coordinated the project, designed the experiments, analyzed the data, and wrote the manuscript. F.V and P.S performed clinical analysis and contributed useful suggestions. Y.J-G, M.R, S.S, I.C, performed statistical analysis and discussed results.
